# Supplementary material
Source: Springer Nature journal article supplement (https://www.springermedizin.de/resource/supplementary/12968_2009_960_MOESM2_ESM.pdf/9580050)

## Sensitivity (95% CI)

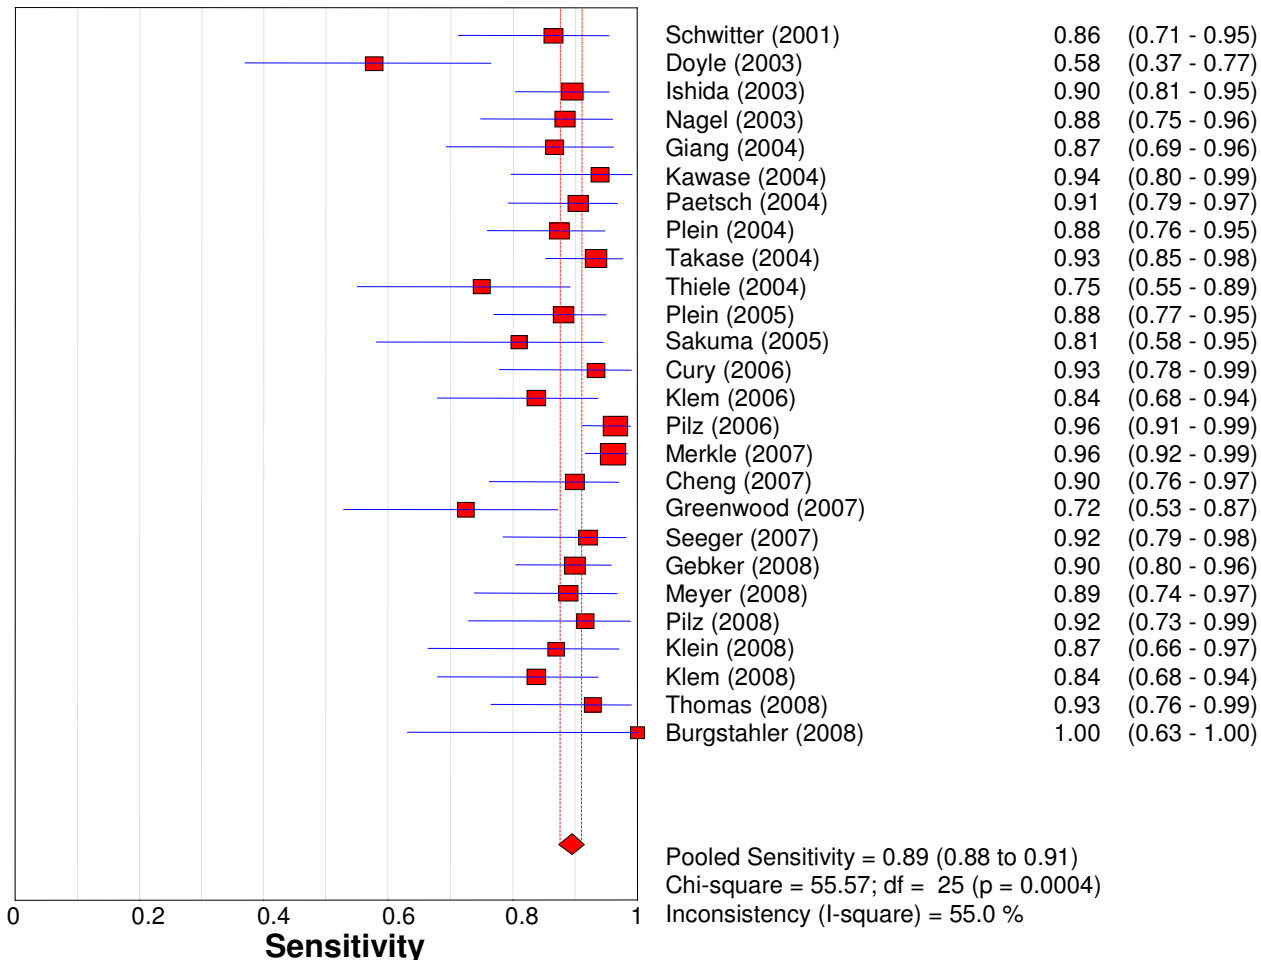

Supplement: MOESM2 [file 9580050]
